# Supplementary material for: Direct synthesis of electrowettable nanostructured hybrid diamond
Source: Royal Society of Chemistry journal article supplement (doi:10.1039/c9ta04165f), 2019-01-01
Supplement: c9ta04165f1.pdf [file c9ta04165f1.pdf]

## Direct Synthesis of Electrowettable Nanostructured Hybrid Diamond

Sujit Deshmukh<sup>a,b</sup>, Kamatchi Jothiramalingam Sankaran<sup>c,d</sup>, Debosmita Banerjee<sup>a</sup>, Chien-Jui Yeh<sup>e</sup>, Key-Chyang Leou<sup>e</sup>, Deodatta Maheshwar Phase<sup>f</sup>, Mukul Gupta<sup>f</sup>, I-Nan Lin<sup>g</sup>, Ken Haenen<sup>c,d</sup>, Susanta Sinha Roy<sup>a\*</sup>, Prashant. R. Waghmare<sup>b\*</sup>

<sup>a</sup>Department of Physics, School of Natural Sciences, Shiv Nadar University, NH-91, Uttar Pradesh 201314, India.

<sup>b</sup> *interfacial* Science and Surface Engineering Lab (*iSSELab*), Department of Mechanical Engineering, University of Alberta, Edmonton, Alberta T6G2G8, Canada

<sup>c</sup>Institute for Materials Research (IMO), Hasselt University, Diepenbeek, Belgium.

<sup>d</sup>IMOMEC, IMEC vzw, Diepenbeek, Belgium.

<sup>e</sup>Department of Engineering and System Science, National Tsing Hua University, Hsinchu, Taiwan, Republic of China.

<sup>f</sup>UGC-DAE Consortium for Scientific Research, University Campus, Khandwa Road, Indore 452017, India.

<sup>g</sup>Department of Physics, Tamkang University, Tamsui, Taiwan, Republic of China.

\*Corresponding authors

Email addresses: [susantaroy69@gmail.com](mailto:susantaroy69@gmail.com) and [waghmare@ualberta.ca](mailto:waghmare@ualberta.ca)

The thickness of the NCD films are measured using cross sectional SEM micrographs and plotted against CH<sub>4</sub> concentration in Figure S1. A general rising trend of film thickness with increasing

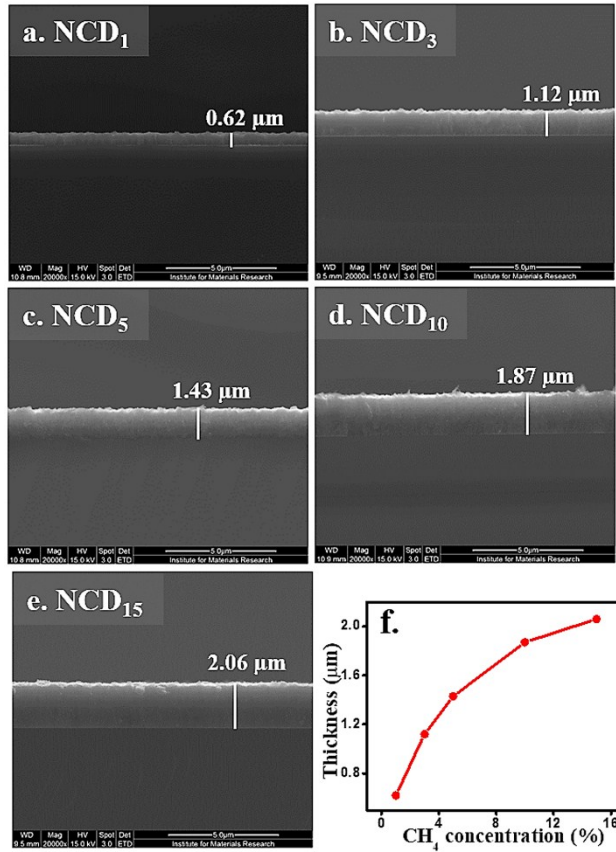

CH<sub>4</sub> concentration is noticed.

Figure S1 Cross sectional SEM images of NCD films grown by (a) 1% (b) 3% (c) 5% (d) 10% and (e) 15% CH<sub>4</sub> concentration. (f) Plot of film thickness as a function of CH<sub>4</sub> concentration.

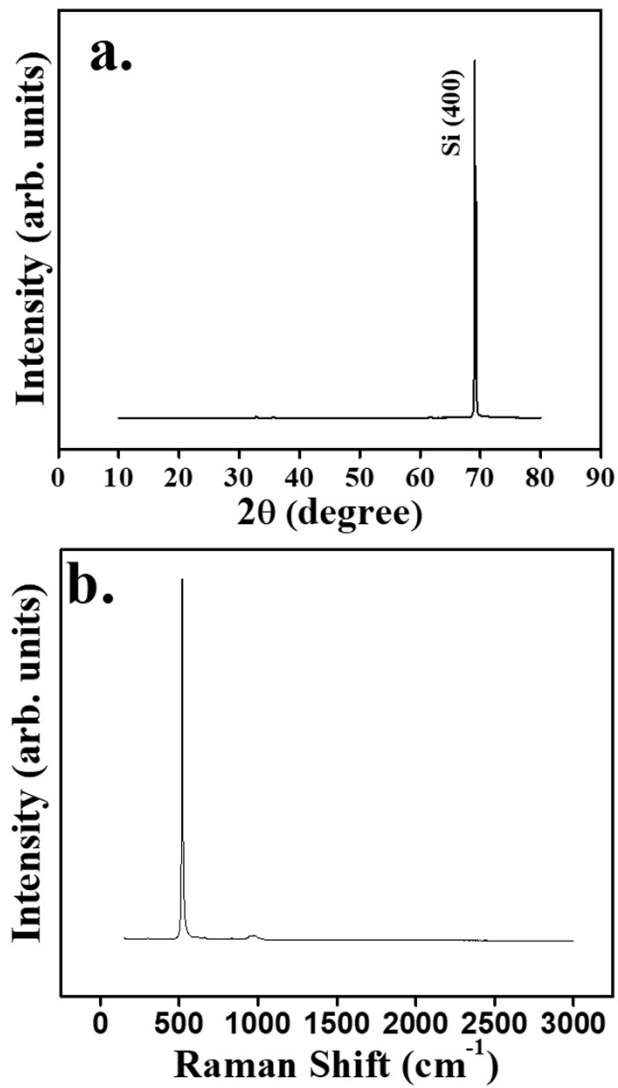

Figure S2(a) XRD and (b) Raman spectrum of Si (100) substrate.

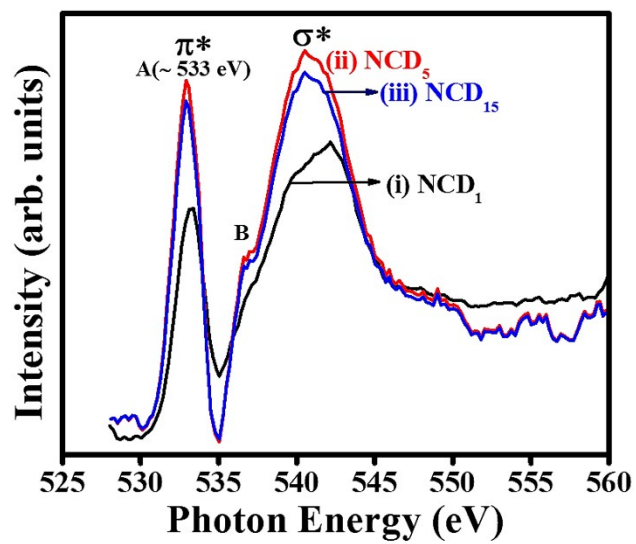

Figure S3 Normalized O-K edge XANES spectra of (i) NCD<sub>1</sub> (ii) NCD<sub>5</sub> and (iii) NCD<sub>15</sub>.
